# Supplementary material
Source: PubMed Central journal article supplement (PMC3853409)
Supplement: mmc1.pdf [file mmc1.pdf]

## **Supplemental Data**

### **Recessive Mutations in *SLC38A8* Cause Foveal Hypoplasia and Optic Nerve Misrouting without Albinism**

James A. Poulter, Musallam Al-Araimi, Ivan Conte, Maria M. van Genderen, Eamonn Sheridan, Ian M. Carr, David A. Parry, Mike Shires, Sabrina Carrella, John Bradbury, Kamron Khan, Phillis Lakeman, Panagiotis I. Sergouniotis, Andrew R. Webster, Anthony T. Moore, Bishwanath Pal, Moin D. Mohamed, Anandula Venkataramana, Vedam Ramprasad, Rohit Shetty, Murugan Saktivel, Govindasamy Kumaramanickavel, Alex Tan, David A. Mackey, Alex W. Hewitt, Sandro Banfi, Manir Ali, Chris F. Inglehearn, and Carmel Toomes

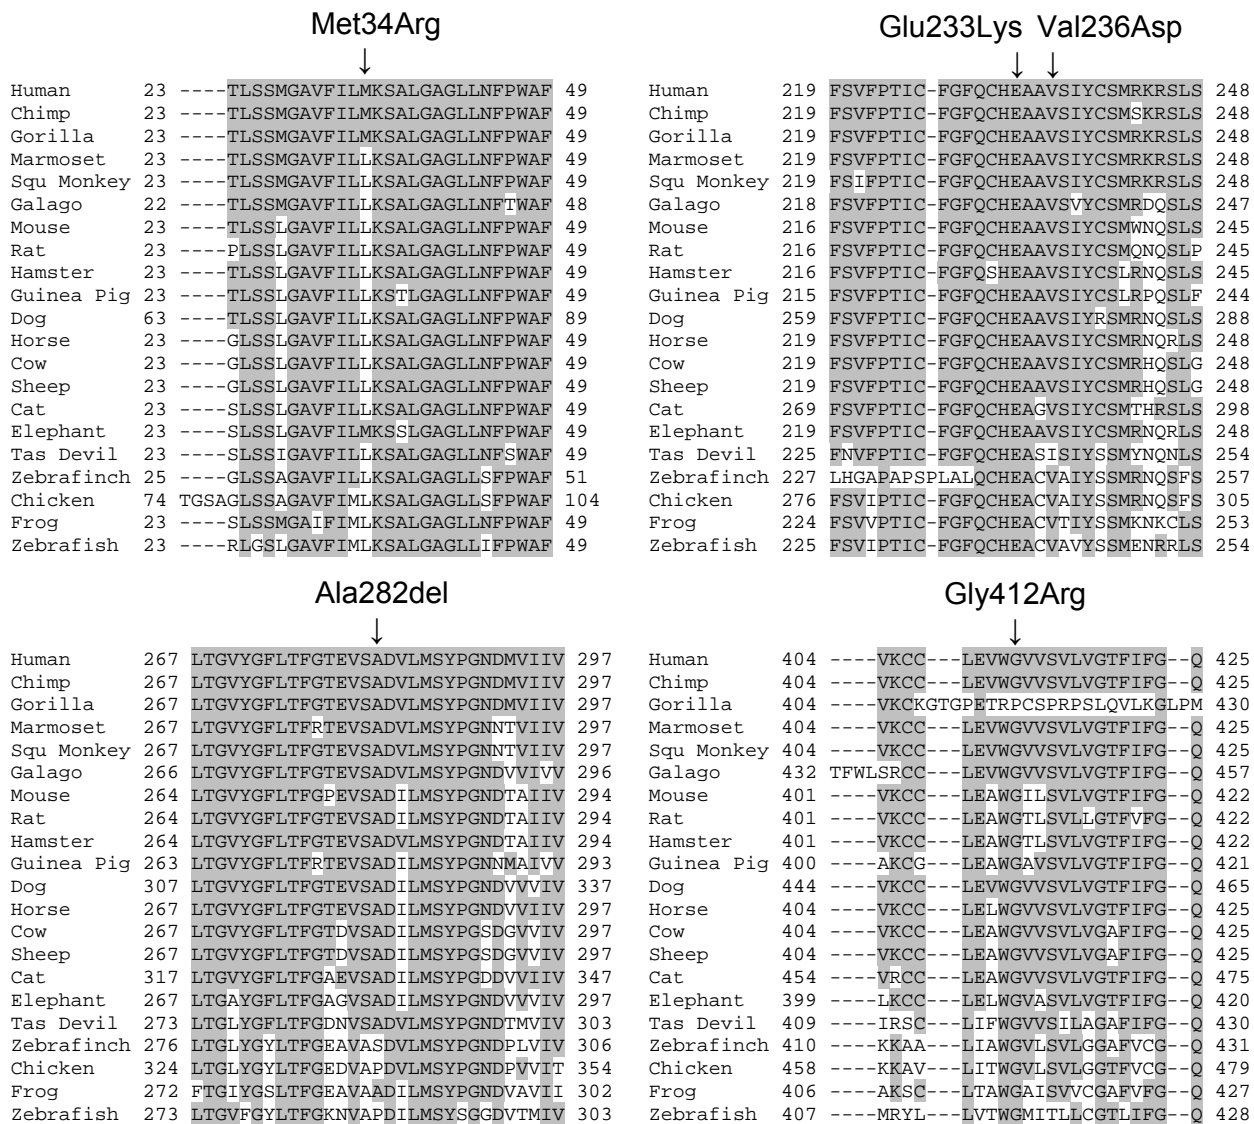

**Figure S1. Protein sequence alignment of human SLC38A8 with all orthologues.** Multiple protein alignments were calculated using ClustalW (<http://www.ebi.ac.uk/clustalw/>) [Larkin, M.A. et al. (2007). *Bioinformatics* 23, 2947-8]. Thirty amino acid residues surrounding each mutation are shown. Conserved amino acid residues are shaded. The positions of the missense mutations p.Met34Arg, p.Glu233Lys, p.Val236Asp and p.Gly412Arg are indicated along with the single deleted amino acid residue p.Ala282. Protein sequences were obtained from NCBI (<http://www.ncbi.nlm.nih.gov/protein>). Accession numbers: Human NP\_001073911.1; Cow NP\_001179423.1; Mouse NP\_001009950.1; Hamster XP\_003495171.1; Elephant XP\_003418131.1; Marmoset XP\_002761268.1; Frog NP\_001037900.1; Tasmanian Devil XP\_003758500.1; Galago XP\_003791463.1; Chimpanzee XP\_003315260.1; Squirrel Monkey dbXP\_003922850.1; Rat NP\_001178938.1; Horse XP\_003364689.1; Dog XP\_546805.3; Gorilla XP\_004058132.1; Cat XP\_003998360.1; Chicken XP\_003641956.1; Zebrafinch XP\_004175047.1; Sheep XP\_004014985.1; Zebrafish NP\_001138287.1; Guinea Pig XP\_003462017.1.

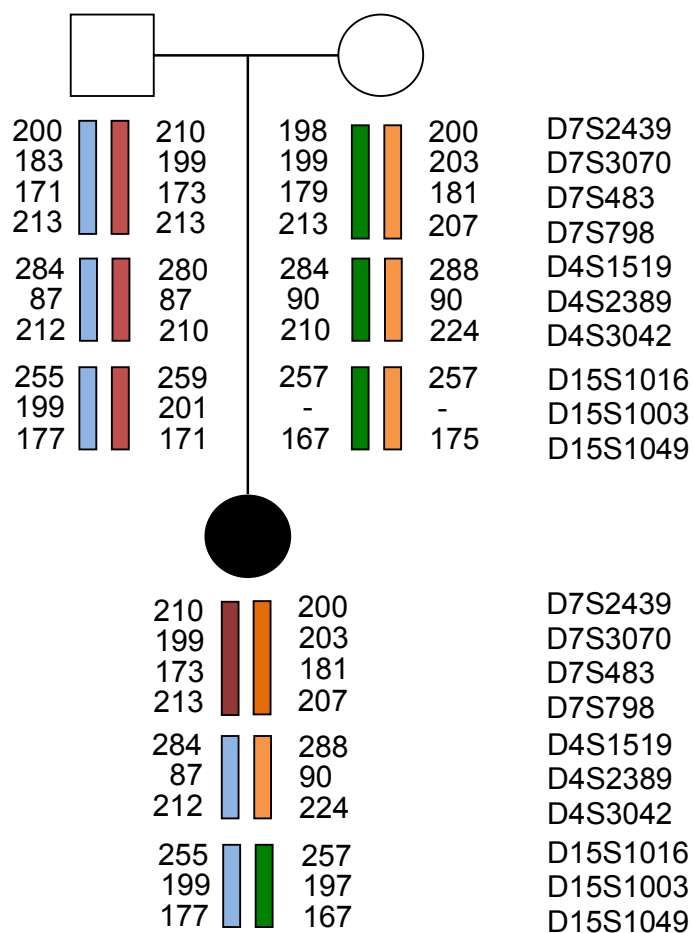

**Figure S2. Paternity testing in family F3.** Results are shown for 10 microsatellites markers, from chromosomes 7, 4 and 15, used to genotype DNA from individuals I:3, I:4 and II:4 from family F3 (Figure 2). Haplotypes are represented by coloured bars (each colour representing a different haplotype). The numbers alongside each haplotype bar correspond to the size of each allele amplified by the microsatellite markers, in base pairs. Mendelian inheritance is observed for all markers indicating no sample mix up or non-paternity.

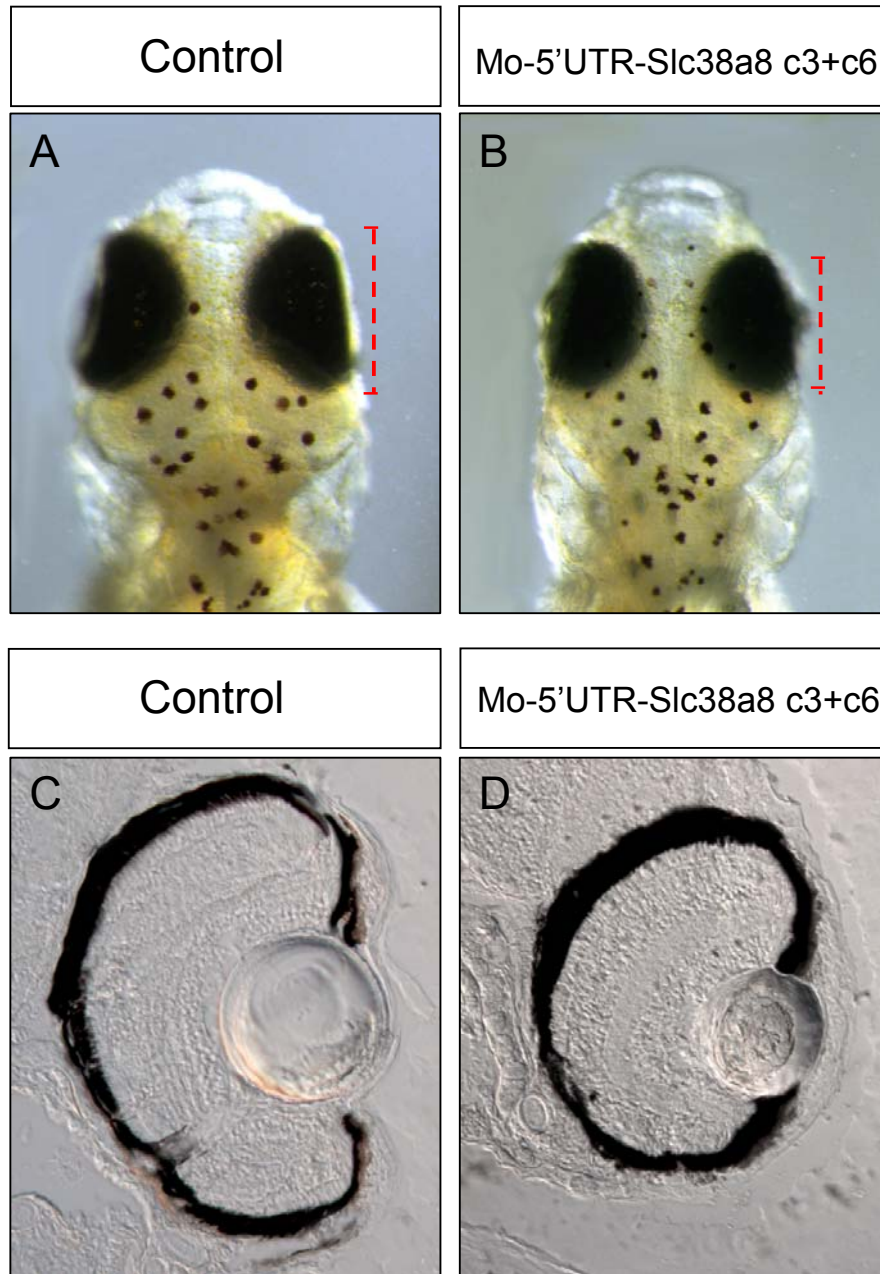

**Figure S3. Knockdown of the *Slc38a8* gene does not cause melanogenesis defects in medaka.** (A, B)

Bright-field stereomicroscopy images of dorsal views of medaka embryos at St40. No differences were observed in tegument melanophores between control (A) and Mo-5'UTR-Slc38a8-c3 and Mo-5'UTR-Slc38a8-c6 co-injected (B) medaka embryos. Dotted red lines indicate the microphthalmic phenotype present in Mo-5'UTR-Slc38a8-c3 and Mo-5'UTR-Slc38a8-c6 co-injected embryos. (C, D) Cryostat frontal sections of the retina from St40 control (C) and Mo-5'UTR-Slc38a8-c3 and Mo-5'UTR-Slc38a8-c6 co-injected (D) medaka embryos. No significant alterations of retinal pigment epithelium (RPE) pigmentation were observed in Mo-5'UTR-Slc38a8-c3 and Mo-5'UTR-Slc38a8-c6 co-injected retina with respect to controls. Other abbreviations: R, retina; L, lens.

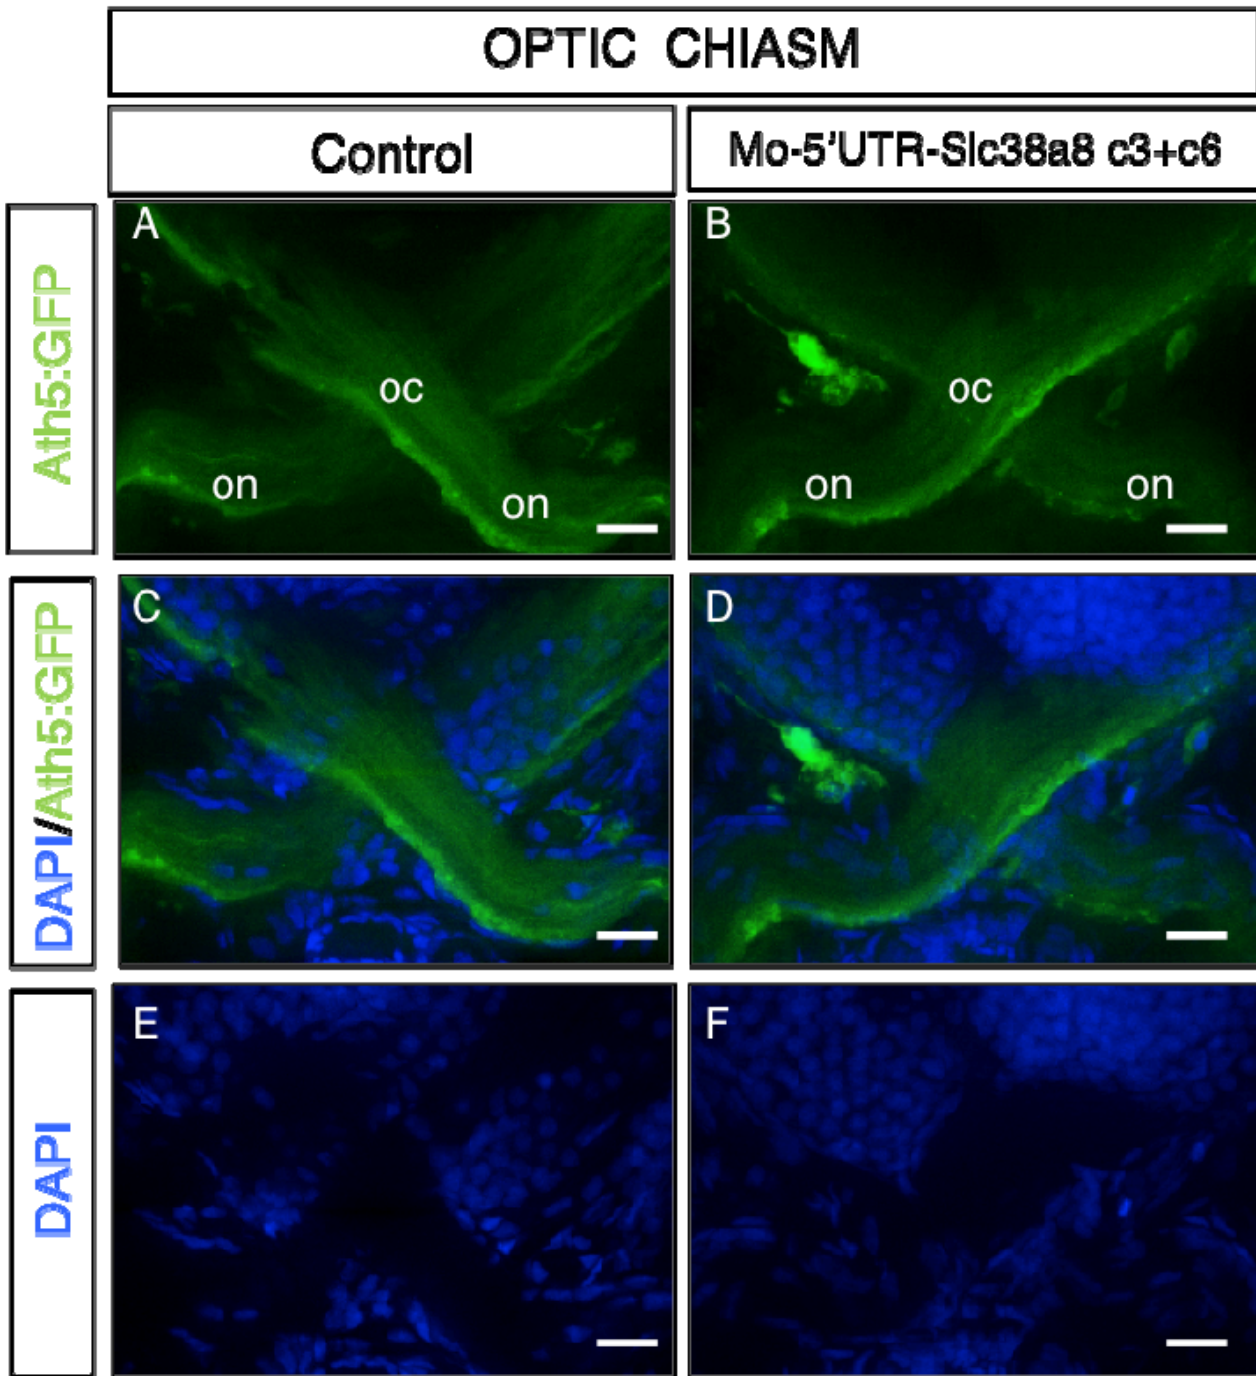

**Figure S4. Analysis of the optic chiasm in medaka *Slc38a8* morpholino knockdown morphants shows no abnormalities.** Confocal images of the optic chiasm from frontal cryostat sections of St38 control and Mo-Slc38a8 injected Ath5::GFP transgenic embryos. Retinal ganglion cell (RGC) axons are EGFP stained (A, B, C, D). Sections are counterstained with DAPI (blue, C, D, E, F). No major alterations in the distribution of RGC axons at the optic chiasm were observed in Mo-5'UTR-Slc38a8-c3 and Mo-5'UTR-Slc38a8-c6 co-injected morphant fish as compared with control embryos. oc, optic chiasm; on, optic nerve. Scale bars: 20µm.

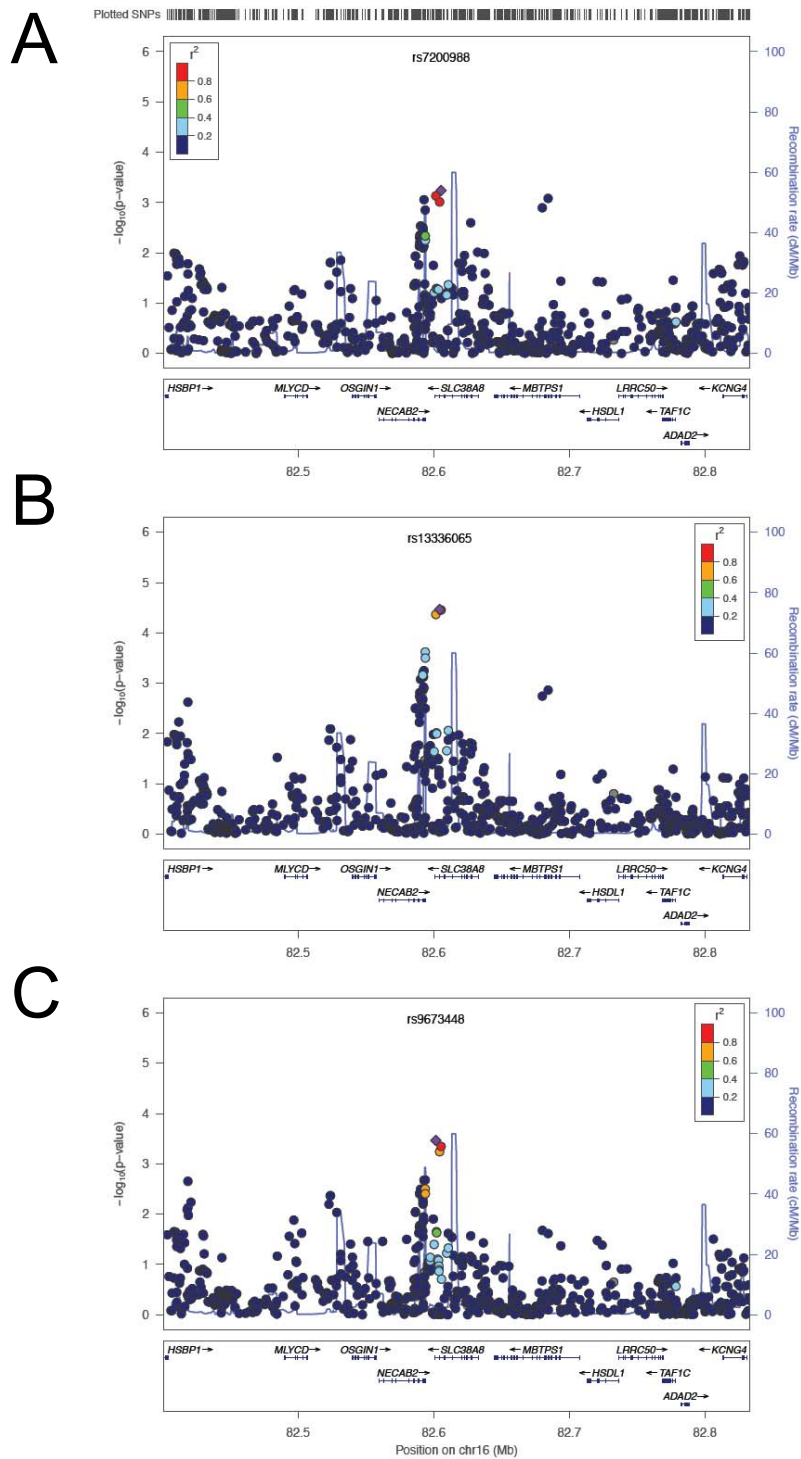

**Figure S5. Role of common single nucleotide polymorphisms (SNPs) at the *SLC38A8* locus in determining foveal thickness in the general population.** Plots were generated using LocusZoom [Pruim, R.J. et al. (2010). *Bioinformatics* 26, 2336-7] and genomic references refer to hg.18. Results from analysis of the foveal thickness (A), the fovea:parafovea thickness ratio (B), and the fovea:perifovea thickness ratio (C) are presented. SNPs are plotted as the  $-\log_{10}$  of the p-value.

**A**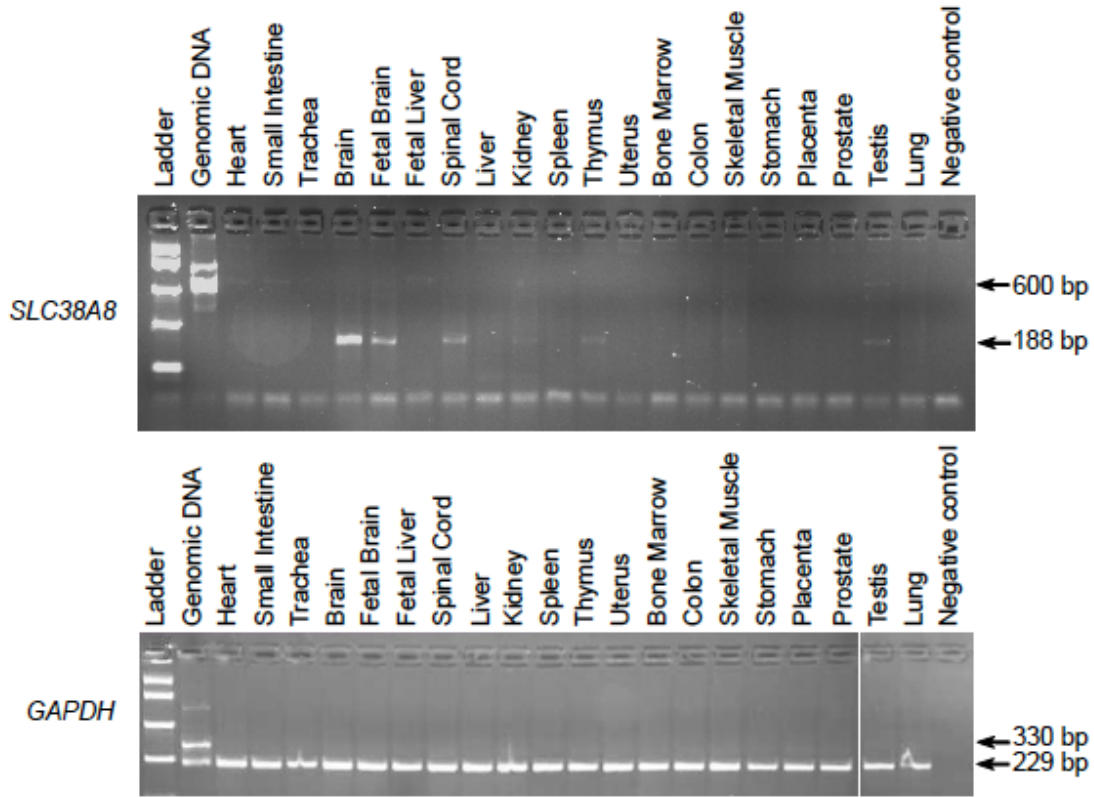**B**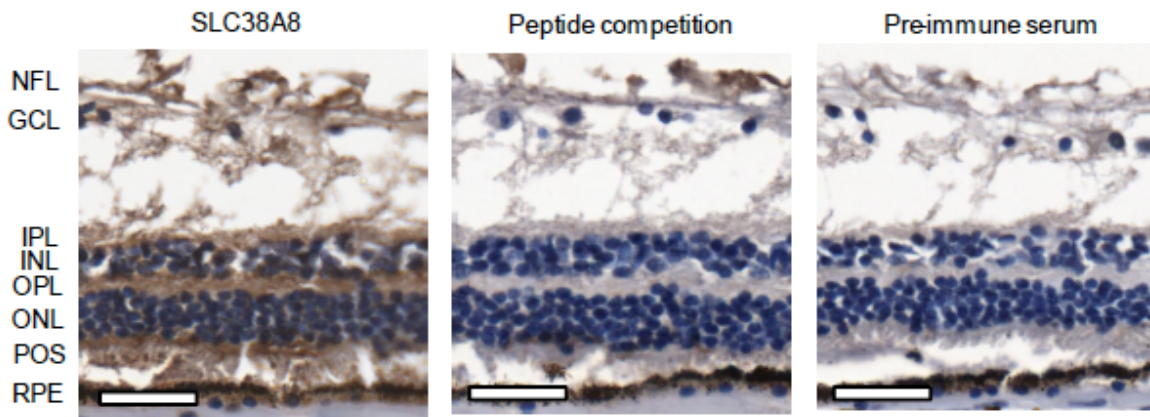**C**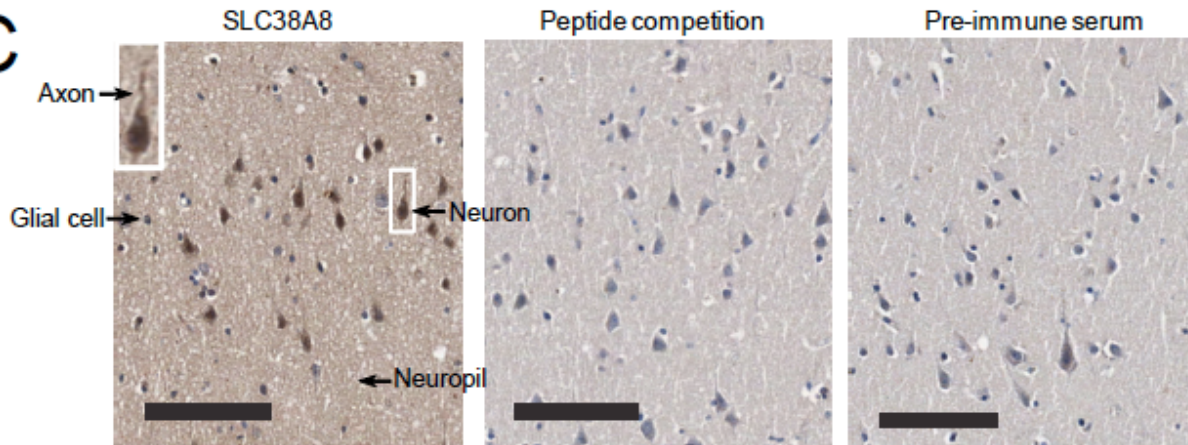

**Figure S6. Human RNA and protein localization data for *SLC38A8*.** (A) RNA expression results.

*SLC38A8* expression is found predominantly in neuronal tissue (brain, fetal brain and spinal cord) with very weak expression also present in the kidney, thymus and testis. Human adult and fetal tissue total RNA was purchased from Clontech and converted to cDNA using standard protocols. A 188-bp fragment of *SLC38A8* spanning intron 7 was amplified from the cDNAs using primers cDNA(7-8)-F 5'-

AATGATATGGTCATCATTGTGG-3' and cDNA(7-8)-R 5'-AGGATGGTCAGCGGCATC-3' (genomic product size was 600 bp). *GAPDH* control primers used were GAPDH-F 5'-

CGACCACTTTGTCAAGCTC-3' and GAPDH-R 5'-CAAGGGTCTACATGGCAAC-3' (cDNA product size was 229 bp and genomic product size was 330 bp). (B) and (C) Protein localization of *SLC38A8*.

Tissues were formalin fixed and paraffin embedded according to standard methods. 4µm serial sections were blocked for endogenous peroxidase activity using 3% hydrogen peroxide in methanol for 10 minutes.

Blocked sections were subsequently incubated with a custom rabbit polyclonal antibody (GenScript, USA), raised against 14 amino acids located at the N-terminus of *SLC38A8* (QTPGSRGLPEKPHP). Primary antibody was applied at a 1/200-250 dilution for eye tissue and 1/400-450 dilution for brain tissue in Zymed diluent (Invitrogen) and incubated overnight at 4°C. To confirm specificity of the antibody, serial sections were incubated with the pre-immune serum of the host rabbit and the custom antibody pre-incubated with the peptide (at a 1:10 ratio). Bound primary antibody was detected with the Rabbit Envision Detection System (Dako, UK) and slides counter-stained in CuSO<sub>4</sub> and Mayers haematoxylin. Finally, sections were dehydrated in increasing concentrations of ethanol (25-100%) and cleared in two changes of xylene before being mounted in DPX mounting media (Sigma).

(B) Protein localization in adult human retina. *SLC38A8* staining is found throughout the neuronal retina with particularly strong staining evident in the inner and outer plexiform layers and the photoreceptor cell layer. NFL - nerve fiber layer, GCL – ganglion cell layer, IPL – inner plexiform layer, INL – inner nuclear layer, OPL – outer plexiform layer, ONL – outer nuclear layer, POS – photoreceptor outer segments, RPE – retinal pigment epithelium. The scale bars represent 40 µm.

(C) Protein localization in human adult brain. A section of grey matter from the occipital lobe is shown and is representative of all brain sections examined (pre-frontal cortex, mid-frontal cortex, primary motor cortex and hippocampus). The majority of the neuronal cells are stained along with the neuropil. However, many glial cells remain unstained. The scale bar represents 100 µm.



**Table S1. *SLC38A8* primers for PCR/sequencing**

| Exon | Forward primer (5'-3')     | Reverse primer (5'-3') | Size (bp) |
|------|----------------------------|------------------------|-----------|
| 1    | GAGCTCTCACTGAGTTGGGG       | CCTCATTAGCTGAGCGGG     | 437       |
| 2    | TGTGGAGAGTGTGCCCCG         | GGAGCCTCCCTTCCCTAC     | 449       |
| 3    | GTGGATGTCCAACCCAG          | CAAATGTGAAGGCCAATTCC   | 350       |
| 4    | ACCTCATTGTCAAGGGCG         | CTCTGCAGTGAGCCACGAGT   | 312       |
| 5    | TTGCAGCCATGCTCTGTTAC       | CCCTGACAGAGAAACCAAGG   | 266       |
| 6    | TCAGGCTATTTCAAGAGAAACCTC   | TGAGGCCTTTTCCTATGCAC   | 398       |
| 7    | AAGGAAAATCTTAGGTGGTAAAGC   | AGTCCCACAGCCGCGTAG     | 352       |
| 8    | TGTGGAACAGGAGCACTGAC       | TCCTACCCATATGTGGCTCC   | 442       |
| 9    | CCTTCCAGCTCCACTGTGTT       | CAGATGCCCTCATACTGGGT   | 380       |
| 10   | CCTACAGGTAAGTGGAAATATTCTGA | GGCATCAGTCTCTCCAGCAT   | 364       |

Primer sequences for all other genes screened are available on request.

**Table S2. Summary of bioinformatics analyses undertaken to predict the pathogenic nature of the missense mutations**

| <b>Mutation</b> | <b>PolyPhen2</b>                | <b>MutationTaster</b>                           | <b>SIFT</b>            | <b>Blosum62*</b> | <b>PROVEAN</b>            | <b>MutPred</b>                                      |
|-----------------|---------------------------------|-------------------------------------------------|------------------------|------------------|---------------------------|-----------------------------------------------------|
| p.Met34Arg      | Benign (score 0.225)            | Disease causing (prediction probability 0.8385) | Tolerated (score 0.07) | Score -1         | Deleterious (score 3.611) | Deleterious mutation (prediction probability 0.893) |
| p.Glu233Lys     | Probably damaging (score 1.000) | Disease causing (prediction probability 1.0000) | Tolerated (score 0.34) | Score +1         | Neutral (score -2.267)    | Deleterious mutation (prediction probability 0.752) |
| p.Val236Asp     | Probably damaging (score 1.000) | Disease causing (prediction probability 0.9999) | Damaging (score 0.03)  | Score -3         | Deleterious (score 6.274) | Deleterious mutation (prediction probability 0.846) |
| p.Gly412Arg     | Probably damaging (score 1.000) | Disease causing (prediction probability 0.9999) | Damaging (score 0.01)  | Score -2         | Deleterious (score 5.317) | Deleterious mutation (prediction probability 0.857) |

URLs: PolyPhen2, <http://genetics.bwh.harvard.edu/pph2/> [Adzhubei, I.A. et al. (2010). Nat. Methods 7, 248-9]; Mutationtaster, <http://www.mutationtaster.org/> [Schwarz, J.M. et al. (2010). Nat. Methods 7, 575-6]; SIFT, <http://sift.jcvi.org/> [Ng, P.C. et al. (2003). Nucleic Acids Res. 31, 3812-4]; Blosum62 [Henikoff, S. et al. (1993). Proteins 17, 49-61]; PROVEAN, <http://provean.jcvi.org/> [Choi, Y. et al. (2012). PLoS ONE 7, e46688]; MutPred, <http://mutpred.mutdb.org/> [Li, B. et al. (2009). Bioinformatics 25, 2744-50]. \*Blosum62 scores range from +3 to -3 and negative scores are more likely to be damaging substitutions.

**Table S3. Medaka *Slc38a8* morpholino sequences**

| Morpholino name         | Sequence (5'-3')           | Concentration (mM) |
|-------------------------|----------------------------|--------------------|
| Mo-5'UTR-Slc38a8-c3     | GGCAGGGTTTGCAAAGAGTTGACAA  | 0.06               |
| mmMo-5'UTR-Slc38a8-c3   | GGtAGcGTTTcCAAAcAGTTtACAA  | 0.06               |
| Mo-spl-Slc38a8-c3-ex4   | GTAAC TCACCCCTGGATGTGTTCTG | 0.06               |
| mmMo-spl-Slc38a8-c3-ex4 | GTAAC TCACgCCTGcATtTGTTgTG | 0.06               |
| Mo-5'UTR-Slc38a8-c6     | TCAGAGGGAAGATGCTCGAGGCAGC  | 0.06               |
| mmMo-5'UTR-Slc38a8-c6   | TCAcAGGcAAGATcCTCtAGGtAGC  | 0.06               |
| Mo-spl-Slc38a8-c6-ex4   | AAAACATACCCAGTGGAGTGGATCG  | 0.06               |
| mmMo-spl-Slc38a8-c6-ex4 | AAAAgATACgCAGTaGAGTcGATTg  | 0.06               |
| Mo-p53 control          | CGGGAATCGCACCGACAACAATACG  | 0.09               |

Mo = morpholino, mmMo = mismatch morpholino. c3 and c6 = chromosome 3 and 6

respectively.

**Table S4. Summary of clinical phenotypes of families with *SLC38A8* mutations**

| <b>Family</b> | <b>Ethnicity</b>  | <b>Foveal hypoplasia</b>                                       | <b>Optic nerve decussation defect</b>               | <b>Anterior segment abnormalities</b>                                                                                             | <b>Iris transillumination</b>                                 | <b>Other notes</b>                                                                                          |
|---------------|-------------------|----------------------------------------------------------------|-----------------------------------------------------|-----------------------------------------------------------------------------------------------------------------------------------|---------------------------------------------------------------|-------------------------------------------------------------------------------------------------------------|
| F1            | Pakistani         | Present in all affected members (IV:1, IV:3, IV:4, IV:6, IV:7) | Present in all affected members tested (IV:1, IV:3) | Posterior embryotoxon in all affected members (IV:1, IV:3, IV:4, IV:6, IV:7) and Axenfeld's anomaly also present in IV:1 and IV:7 | Absent in all affected members (IV:1, IV:3, IV:4, IV:6, IV:7) |                                                                                                             |
| F2            | Afghan            | Present in both affected members (V:2 and V:5)                 | Present in both affected members (V:2 and V:5)      | Posterior embryotoxon present in both members (V:2 and V:5)                                                                       | Absent in both affected members (V:2 and V:5)                 |                                                                                                             |
| F3            | Northern European | Present in single affected case (II:4)                         | Present in single affected case (II:4)              | None                                                                                                                              | Absent in single affected case (II:4)                         | Kartagener syndrome also present in II:4                                                                    |
| F4            | Pakistani         | Present in single affected case (II:1)                         | Test inconclusive in single affected case (II:1)    | None                                                                                                                              | Absent in single affected case (II:1)                         |                                                                                                             |
| F5            | Turkish           | Present in single affected case (IV:1)                         | Present in single affected case (IV:1)              | None                                                                                                                              | Absent in single affected case (IV:1)                         |                                                                                                             |
| F6            | Indian            | Present in all examined affected members (IV:7, VI:1, VI:2)    | Not tested                                          | None                                                                                                                              | Absent in all examined affected members (IV:7, VI:1, VI:2)    | IV:7 and VI:1 have bilateral microphthalmia and IV:7 has a unilateral retinochoroidal coloboma (right eye). |
| F7            | Northern European | Present in both affected members (II:1, II:2)                  | Present in both affected members (II:1, II:2)       | Axenfeld's anomaly present in only II:2                                                                                           | Absent in both affected members (II:1, II:2)                  |                                                                                                             |

Detailed descriptions of members of F1, F2, F3 and F6 have been reported previously.<sup>4, 5, 6, 8</sup>

**Table S5. Top associated variants at the *SLC38A8* locus with foveal thickness parameters in the general population, using data from the Raine Eye Health Study**

| Trait                           | SNP        | CHR | BP       | Effect |       |        |       |          |      |         |
|---------------------------------|------------|-----|----------|--------|-------|--------|-------|----------|------|---------|
|                                 |            |     |          | Allele | MAF   | Beta   | SE    | P        | HWE  | IxScore |
| Fovea Thickness                 | rs7200988  | 16  | 82605474 | A      | 0.051 | -0.456 | 0.132 | 5.77E-04 | 0.41 | 0.83    |
| Fovea:Parafovea Thickness Ratio | rs13336065 | 16  | 82604407 | A      | 0.045 | -0.596 | 0.143 | 3.44E-05 | 1.00 | 0.84    |
| Fovea:Perifovea Thickness Ratio | rs9673448  | 16  | 82601632 | C      | 0.056 | -0.467 | 0.130 | 3.42E-04 | 0.72 | 0.84    |

SNP, single nucleotide polymorphism; CHR, chromosome; BP, base position on hg.18; MAF, minor allele frequency; SE, standard error; HWE, Hardy-Weinberg Equilibrium; IxScore, imputation QC score.
